# Supplementary material for: Functionalized boron nitride nanosheets conjugated with plant micronutrients as seed dressing agents towards control of bacterial wilt disease
Source: Royal Society of Chemistry journal article supplement (doi:10.1039/d3en00173c), 2023-01-01
Supplement: d3en00173c1.pdf [file d3en00173c1.pdf]

## Supporting Information

# Functionalized boron nitride nanosheets conjugated with plant micronutrients as seed dressing agents towards control of bacterial wilt disease

*Li Hao<sup>a##</sup>, Mei Guan<sup>b#</sup>, Qiangcheng Zheng<sup>a</sup>, Minyan Zhou<sup>a</sup>, Ziting Yin<sup>a</sup>, Hongjun*

*Zhou<sup>a\*</sup>, Xinhua Zhou<sup>a\*</sup>*

<sup>a</sup> Key Laboratory of Green Prevention and Control on Fruits and Vegetables in South China of Ministry of Agriculture and Rural Affairs, Innovative Institute for Plant Health, School of Chemistry and Chemical Engineering, Zhongkai University of Agriculture and Engineering, Guangzhou, Guangdong, 510225, P. R. China

<sup>b</sup> College of Plant Protection, China Agricultural University, Beijing 100193, P.R. China

<sup>#</sup> Li Hao and Mei Guan contributed equally to this work.

Corresponding authors:

\* Li Hao, Phone: +86-20-89003114, E-mail: haoli20@tju.edu.cn

\* Hongjun Zhou, Phone: +86-20-89003114, E-mail: hongjunzhou@163.com

\* Xinhua Zhou, Phone: +86-20-89003114, E-mail: cexinhua Zhou@163.com

### S3. Results and discussion

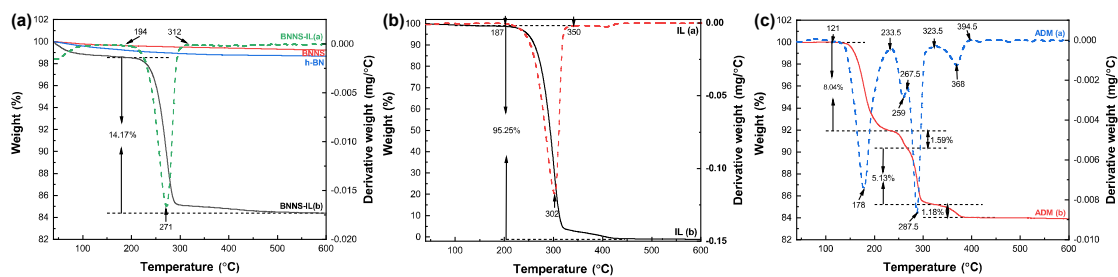

**Figure S1.** (a) TG (solid line) and DTG (dashed line) curves of pristine h-BN, BNNS, BNNS-IL, (b) TG (solid line) and DTG (dashed line) of pure IL, (c) TG (solid line) and DTG (dashed line) of pure ADM.
